# Supplementary material
Source: PubMed Central journal article supplement (PMC3370073)
Supplement: NIHMS372247-supplement-1.pdf [file NIHMS372247-supplement-1.pdf]

# Supplementary Figure 1

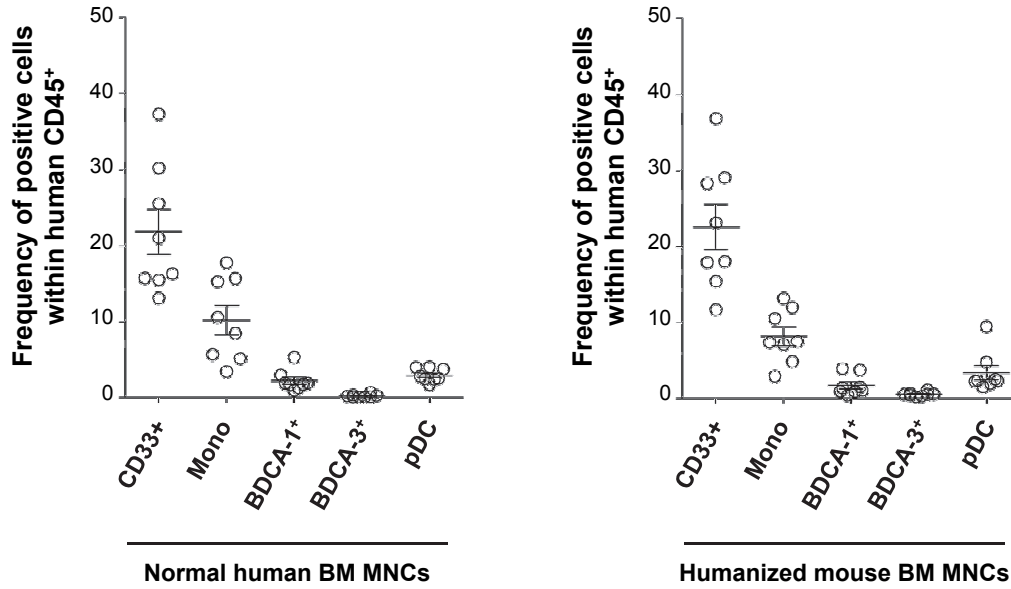

**SUPPLEMENTARY FIGURE 1.** Frequencies of human myeloid cells in primary human BM MNCs and humanized mouse BM MNCs. Frequencies of total human CD33<sup>+</sup> myeloid subsets, monocytes, BDCA1<sup>+</sup> cDCs, BDCA3<sup>+</sup> cDCs, and pDCs out of hCD45<sup>+</sup> cells of primary human BM MNCs (left) and humanized mouse BM MNCs (right) are shown.

## Supplementary Figure 2

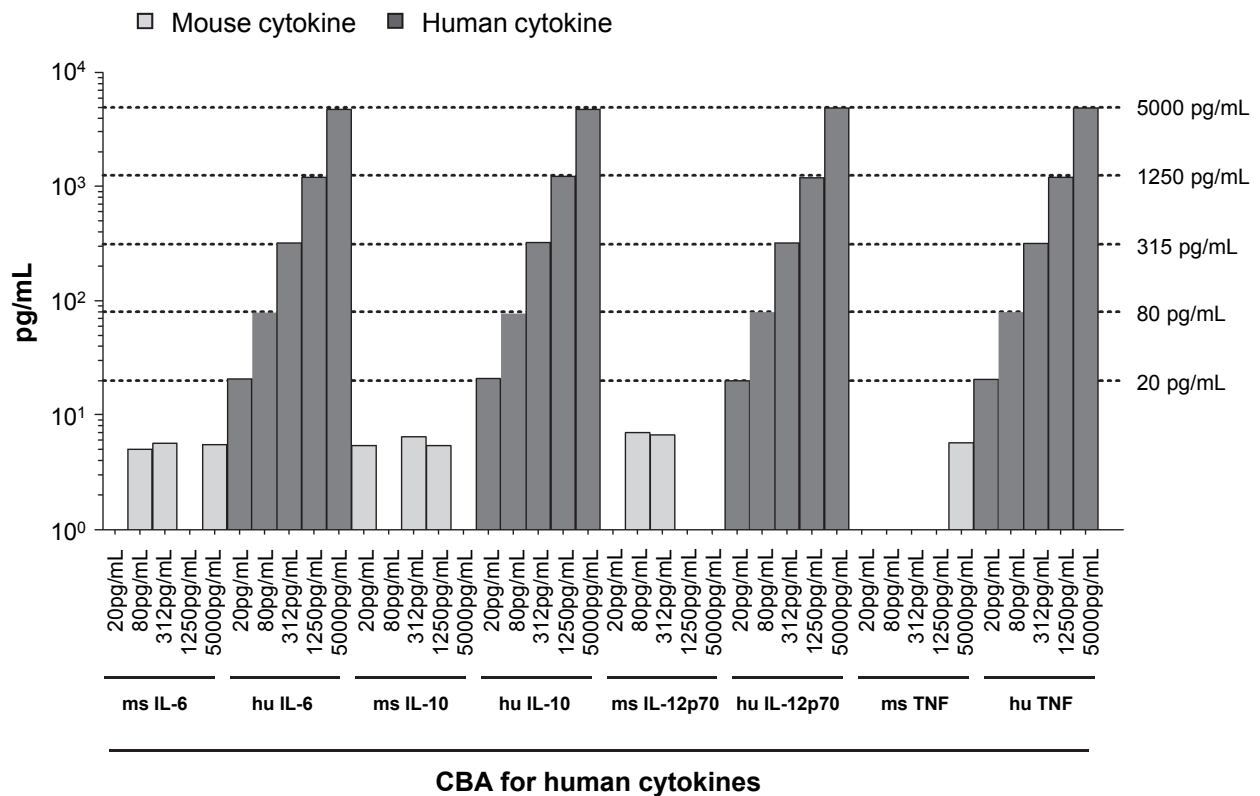

**SUPPLEMENTARY FIGURE 2.** Species specificity of anti-human cytokine antibodies used in Cytometric Bead Array. Human and mouse recombinant IL-6, IL-10, IL-12p70, and TNF at 20-5000 pg/ml were used to examine whether species cross-reactivity exists in anti-human cytokine antibodies. Each anti-human cytokine antibody detected human cytokine but not mouse cytokine, in a dose-dependent manner, demonstrating species-specificity of the antibodies used.
